# Supplementary material for: Optimal Avapritinib Treatment Strategies for Patients with Metastatic or Unresectable Gastrointestinal Stromal Tumors
Source: PubMed Central journal article supplement — Oncologist. 2021 Jan 5;26(4):e622–31. doi: 10.1002/onco.13632 (PMC8018323; doi:10.1002/onco.13632), 2021-01-05
Supplement: ONCO-26-e622-s001.pdf [file ONCO-26-e622-s001.pdf]

Supplemental Tables for:  
 Optimal Avapritinib Treatment Strategies for Patients with Metastatic or Unresectable Gastrointestinal Stromal Tumors  
 Cissimol Joseph et al.

**Table S1.** Protocol-specified dose-modification guidelines

| <b>Toxicity</b>                     | <b>Modification</b>                                                                                                                                                                                                                                                                                                                                                                                                                                                                                                                                                                                                                                                                      |
|-------------------------------------|------------------------------------------------------------------------------------------------------------------------------------------------------------------------------------------------------------------------------------------------------------------------------------------------------------------------------------------------------------------------------------------------------------------------------------------------------------------------------------------------------------------------------------------------------------------------------------------------------------------------------------------------------------------------------------------|
| <b>General</b>                      |                                                                                                                                                                                                                                                                                                                                                                                                                                                                                                                                                                                                                                                                                          |
| Grade 1 or 2                        | No dose modification required                                                                                                                                                                                                                                                                                                                                                                                                                                                                                                                                                                                                                                                            |
| Grade 3 or 4 of any duration        | Hold until event is grade $\leq 2$ or has returned to baseline, then resume by reducing the dose by 100 mg less than the current dose<br>If the patient is already receiving a dose of 100 mg, and continued treatment is considered in the best medical interest of the patient due to the underlying GIST, treatment may be resumed at 100 mg, after the adverse event has improved to grade $\leq 2$                                                                                                                                                                                                                                                                                  |
| <b>Cognitive effects</b>            |                                                                                                                                                                                                                                                                                                                                                                                                                                                                                                                                                                                                                                                                                          |
| Grade 1 with only mild impairment   | No dose modification required if the investigator considers it in the best medical interest of the patient to continue treatment. Written documentation that continuation of treatment is in the best medical interest of the patient must be provided to the sponsor                                                                                                                                                                                                                                                                                                                                                                                                                    |
| Grade 1, other than mild impairment | Interrupt dosing for 7 days, and resume dosing without dose reduction<br>The dosing interruption may be repeated if the impairment continues to worsen after resuming dosing; however, repeated dosing interruption is not required, and should be balanced with the need to treat the underlying GIST<br>If dosing will be resumed after interruption or continued without interruption, written documentation that resumption or continuation of treatment is in the best medical interest of the patient must be provided to the sponsor                                                                                                                                              |
| Grade 2                             | Interrupt dosing for a minimum of 7 days<br>Resume dosing with a dose reduction of 100 mg when the cognitive effect has improved to grade $\leq 1$ , or while still at grade 2, if continued treatment is considered in the best medical interest of the patient due to the underlying GIST<br>If the patient is already receiving a dose of 100 mg, and continued treatment is considered in the best medical interest of the patient due to the underlying GIST, treatment may be resumed at 100 mg<br>If dosing will be resumed after interruption, written documentation that resumption of treatment is in the best medical interest of the patient must be provided to the sponsor |
| Grade 3 or 4                        | Interrupt dosing for a minimum of 14 days<br>Resume dosing with a dose reduction of 100 mg when the cognitive effect has improved to grade $\leq 1$ , or when it has improved to grade 2, if continued treatment is considered in the best medical interest of the patient due to the underlying GIST<br>If the patient is already receiving a dose of 100 mg, and continued treatment is considered in the best medical interest of the patient due to                                                                                                                                                                                                                                  |

Supplemental Tables for:

Optimal Avapritinib Treatment Strategies for Patients with Metastatic or Unresectable Gastrointestinal Stromal Tumors

Cissimol Joseph et al.

the underlying GIST, treatment may be resumed at 100 mg, after the cognitive effect has improved to grade  $\leq 2$  or lower  
If dosing will be resumed after interruption, written documentation that resumption of treatment is in the best medical interest of the patient must be provided to the sponsor

---

**Intracranial bleeding**

|              |                                                                                                                                                                                                                                                                                                                                                                                                                                                                                                                                                                                                                                                                                                                  |
|--------------|------------------------------------------------------------------------------------------------------------------------------------------------------------------------------------------------------------------------------------------------------------------------------------------------------------------------------------------------------------------------------------------------------------------------------------------------------------------------------------------------------------------------------------------------------------------------------------------------------------------------------------------------------------------------------------------------------------------|
| Grade 1      | Interrupt dosing for a minimum of 7 days, and re-image brain<br>Resume dosing without dose reduction if the bleed is stable or improving and continued treatment is considered in the best medical interest of the patient due to the underlying GIST<br>If dosing will be resumed after interruption, written documentation that resumption of treatment is in the best medical interest of the patient must be provided to the sponsor                                                                                                                                                                                                                                                                         |
| Grade 2      | Interrupt dosing for a minimum of 14 days and re-image brain<br>Resume dosing with a dose reduction of 100 mg when the intracranial bleeding has improved to grade $\leq 1$ , or while still at grade 2, if continued treatment is considered in the best medical interest of the patient due to the underlying GIST<br>If the patient is already receiving a dose of 100 mg and continued treatment is considered in the best medical interest of the patient due to the underlying GIST, treatment may be resumed at 100 mg<br>If dosing will be resumed after interruption, written documentation that resumption of treatment is in the best medical interest of the patient must be provided to the sponsor |
| Grade 3 or 4 | Permanently discontinue avapritinib treatment                                                                                                                                                                                                                                                                                                                                                                                                                                                                                                                                                                                                                                                                    |

---

Abbreviation: GIST, gastrointestinal stromal tumor.

Reprinted from *Lancet Oncol*, 21, Heinrich MC et al, Avapritinib in advanced PDGFRA D842V-mutant gastrointestinal stromal tumour (NAVIGATOR): a multicentre, open-label, phase 1 trial, 935-46, Copyright 2020, with permission from Elsevier.

Supplemental Tables for:  
Optimal Avapritinib Treatment Strategies for Patients with Metastatic or Unresectable Gastrointestinal Stromal Tumors  
Cissimol Joseph et al.

**Table S2.** Presentation of *Common Terminology Criteria for Adverse Events* (CTCAE) [1] cognitive effects adverse events

| <b>Cognitive effect</b> | <b>Presentation</b>                                                                                                         |
|-------------------------|-----------------------------------------------------------------------------------------------------------------------------|
| Memory impairment       |                                                                                                                             |
| Grade 1                 | Mild memory impairment that does not interfere with daily performance                                                       |
| Grade 2                 | Moderate memory impairment that limits daily activities                                                                     |
| Grade 3                 | Severe memory impairment that limits both daily activities and self-care                                                    |
| Cognitive disorder      |                                                                                                                             |
| Grade 1                 | Mild cognitive disability that does not interfere with daily performance                                                    |
| Grade 2                 | Moderate cognitive disability that interferes with daily performance, but the patient remains capable of independent living |
| Grade 3                 | Severe cognitive disability resulting in a significant impairment of daily performance                                      |
| Confusional state       |                                                                                                                             |
| Grade 1                 | Mild disorientation                                                                                                         |
| Grade 2                 | Moderate disorientation that limits daily performance                                                                       |
| Grade 3                 | Severe disorientation that limits both daily activities and self-care                                                       |
| Grade 4                 | Life-threatening consequences requiring urgent intervention                                                                 |
| Grade 5                 | Death                                                                                                                       |
| Encephalopathy          |                                                                                                                             |
| Grade 1                 | Mild symptoms                                                                                                               |
| Grade 2                 | Moderate symptoms that limit daily activities                                                                               |
| Grade 3                 | Severe symptoms that limit both daily activities and self-care                                                              |
| Grade 4                 | Life-threatening consequences requiring urgent intervention                                                                 |
| Grade 5                 | Death                                                                                                                       |

Supplemental Tables for:  
Optimal Avapritinib Treatment Strategies for Patients with Metastatic or Unresectable Gastrointestinal Stromal Tumors  
Cissimol Joseph et al.

**Table S3.** All-cause AEs by age among patients starting with avapritinib 300 mg

|                           | <65 years (n = 102) |           | ≥65 years (n = 65) |           |
|---------------------------|---------------------|-----------|--------------------|-----------|
|                           | Any grade           | Grade ≥3  | Any grade          | Grade ≥3  |
| AE <sup>a</sup> , n (%)   | 101 (99.0)          | 66 (64.7) | 65 (100)           | 55 (84.6) |
| Nausea                    | 65 (63.7)           | 1 (<1.0)  | 38 (58.5)          | 1 (1.5)   |
| Fatigue                   | 48 (47.1)           | 1 (<1.0)  | 40 (61.5)          | 9 (13.8)  |
| Anemia                    | 46 (45.1)           | 24 (23.5) | 41 (63.1)          | 27 (41.5) |
| Diarrhea                  | 38 (37.3)           | 2 (2.0)   | 32 (49.2)          | 6 (9.2)   |
| Decreased appetite        | 34 (33.3)           | 3 (2.9)   | 27 (41.5)          | 1 (1.5)   |
| Periorbital edema         | 33 (32.4)           | 1 (<1.0)  | 31 (47.7)          | 1 (1.5)   |
| Vomiting                  | 33 (32.4)           | 2 (2.0)   | 25 (38.5)          | 2 (3.1)   |
| Face edema                | 30 (29.4)           | 0 (0)     | 8 (12.3)           | 0 (0)     |
| Increased lacrimation     | 26 (25.5)           | 0 (0)     | 25 (38.5)          | 0 (0)     |
| Hair color changes        | 24 (23.5)           | 0 (0)     | 9 (13.8)           | 0 (0)     |
| Blood bilirubin increased | 23 (22.5)           | 5 (4.9)   | 14 (21.5)          | 3 (4.6)   |
| Abdominal pain            | 22 (21.6)           | 7 (6.9)   | 19 (29.2)          | 4 (6.2)   |
| Constipation              | 19 (18.6)           | 1 (<1.0)  | 19 (29.2)          | 2 (3.1)   |
| Headache                  | 19 (18.6)           | 0 (0)     | 8 (12.3)           | 1 (1.5)   |
| Hypokalemia               | 18 (17.6)           | 3 (2.9)   | 12 (18.5)          | 4 (6.2)   |
| Edema peripheral          | 17 (16.7)           | 1 (<1.0)  | 28 (43.1)          | 0 (0)     |
| Dysgeusia                 | 16 (15.7)           | 0 (0)     | 14 (21.5)          | 0 (0)     |
| Dizziness                 | 14 (13.7)           | 1 (<1.0)  | 13 (20.0)          | 0 (0)     |
| Weight decreased          | 13 (12.7)           | 1 (<1.0)  | 14 (21.5)          | 1 (1.5)   |
| Hypophosphatemia          | 13 (12.7)           | 2 (2.0)   | 11 (16.9)          | 6 (9.2)   |
| Dyspepsia                 | 12 (11.8)           | 0 (0)     | 15 (23.1)          | 0 (0)     |
| Pyrexia                   | 12 (11.8)           | 0 (0)     | 10 (15.4)          | 0 (0)     |
| Dyspnea                   | 11 (10.8)           | 1 (<1.0)  | 16 (24.6)          | 3 (4.6)   |
| Pleural effusion          | 10 (9.8)            | 1 (<1.0)  | 11 (16.9)          | 1 (1.5)   |
| Hypomagnesemia            | 5 (4.9)             | 0 (0)     | 15 (23.1)          | 1 (1.5)   |
| Cough                     | 4 (3.9)             | 0 (0)     | 10 (15.4)          | 0 (0)     |
| Cognitive effects         | 40 (39.2)           | 1 (<1.0)  | 38 (58.5)          | 4 (6.2)   |
| Memory impairment         | 25 (24.5)           | 0 (0)     | 20 (30.8)          | 1 (1.5)   |
| Cognitive disorder        | 11 (10.8)           | 1 (<1.0)  | 10 (15.4)          | 0 (0)     |
| Confusional state         | 4 (3.9)             | 0 (0)     | 7 (10.8)           | 2 (3.1)   |
| Encephalopathy            | 0 (0)               | 0 (0)     | 1 (1.5)            | 1 (1.5)   |
| Intracranial bleeding     | 3 (2.9)             | 1 (<1.0)  | 1 (1.5)            | 1 (1.5)   |
| Intracranial hemorrhage   | 2 (2.0)             | 1 (<1.0)  | 1 (1.5)            | 1 (1.5)   |
| Subdural hematoma         | 1 (<1.0)            | 0 (0)     | 0 (0)              | 0 (0)     |
| Cerebral hemorrhage       | 0 (0)               | 0 (0)     | 0 (0)              | 0 (0)     |

The cutoff date for these analyses was April 2, 2019.

<sup>a</sup>Preferred Terms for any-grade AEs reported in ≥15% of patients in either dose group.

Abbreviation: AE, adverse event.

Supplemental Tables for:  
Optimal Avapritinib Treatment Strategies for Patients with Metastatic or Unresectable Gastrointestinal Stromal Tumors  
Cissimol Joseph et al.

**Table S4.** Correlation between patient characteristics and cognitive effects. Univariable logistic regression of cognitive events in patients who started on avapritinib 300 mg

| Patient characteristics                | Description               | Odds ratio (95% CI) | p value |
|----------------------------------------|---------------------------|---------------------|---------|
| Race                                   | White ( <i>n</i> = 114)   | Reference           |         |
|                                        | Nonwhite ( <i>n</i> = 38) | 1.288 (0.613–2.706) | .603    |
|                                        | Unknown ( <i>n</i> = 15)  | 1.061 (0.353–3.185) | .904    |
| Gender                                 | Male ( <i>n</i> = 103)    | Reference           |         |
|                                        | Female ( <i>n</i> = 64)   | 1.035 (0.548–1.954) | .916    |
| Baseline ECOG performance status       | 0 ( <i>n</i> = 66)        | Reference           |         |
|                                        | 1 ( <i>n</i> = 96)        | 0.583 (0.308–1.104) | .841    |
|                                        | 2 ( <i>n</i> = 5)         | 0.266 (0.028–2.505) | .350    |
| Number of prior TKIs                   | <4                        | Reference           |         |
|                                        | ≥4                        | 1.016 (0.521–1.982) | .963    |
| Total duration of prior TKI use, years | 167                       | 0.987 (0.913–1.067) | .747    |

Abbreviations: CI, confidence interval; ECOG, Eastern Cooperative Oncology Group; TKI, tyrosine kinase inhibitor.

**Table S5.** Summary of cognitive effects in patients starting with avapritinib 300 mg

|                                 | Patients ( <i>n</i> = 167) |          |          |                    | AEs leading to permanent treatment discontinuation |
|---------------------------------|----------------------------|----------|----------|--------------------|----------------------------------------------------|
|                                 | AE incidence               |          |          |                    |                                                    |
|                                 | Grade 1                    | Grade 2  | Grade 3  | Total <sup>a</sup> |                                                    |
| Cognitive effects, <i>n</i> (%) | 47 (28.1)                  | 15 (9.0) | 5 (3.0)  | 67 (40.1)          | 10 (6.0)                                           |
| Memory impairment               | 36 (21.6)                  | 8 (4.8)  | 1 (<1.0) | 45 (26.9)          | 1 (<1.0)                                           |
| Cognitive disorder <sup>b</sup> | 12 (7.2)                   | 8 (4.8)  | 1 (<1.0) | 21 (12.6)          | 5 (3.0)                                            |
| Confusional state               | 7 (4.2)                    | 2 (1.2)  | 2 (1.2)  | 11 (6.6)           | 2 (1.2)                                            |
| Encephalopathy                  | 0                          | 0        | 1 (<1.0) | 1 (<1.0)           | 2 (1.2)                                            |

<sup>a</sup>No patient experienced grade 4 or 5 cognitive effects.

<sup>b</sup>Cognitive disorders leading to permanent treatment discontinuation included acute psychotic episode, worsening cognitive disturbances, mental status change, and delirium.

Abbreviation: AE, adverse event.

Supplemental Tables for:  
Optimal Avapritinib Treatment Strategies for Patients with Metastatic or Unresectable Gastrointestinal Stromal Tumors  
Cissimol Joseph et al.

#### References

1. National Institutes of Health and National Cancer Institute. Common Terminology Criteria for Adverse Events (CTCAE), version 4.0. 2009. Available at [https://evs.nci.nih.gov/ftp1/CTCAE/CTCAE\\_4.03/Archive/CTCAE\\_4.0\\_2009-05-29\\_QuickReference\\_8.5x11.pdf](https://evs.nci.nih.gov/ftp1/CTCAE/CTCAE_4.03/Archive/CTCAE_4.0_2009-05-29_QuickReference_8.5x11.pdf). Accessed March 4, 2020.
